# Supplementary material
Source: Springer Nature journal article supplement (https://www.springermedizin.de/resource/supplementary/12889_2013_6522_MOESM3_ESM.pdf/9498030)

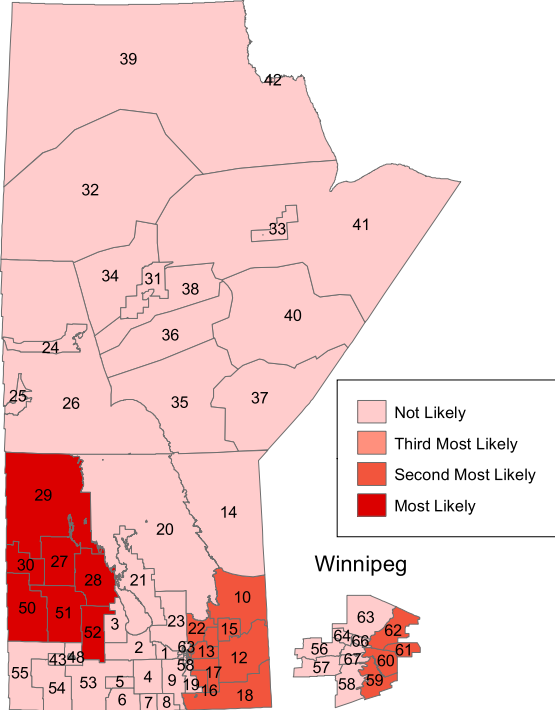

CSS

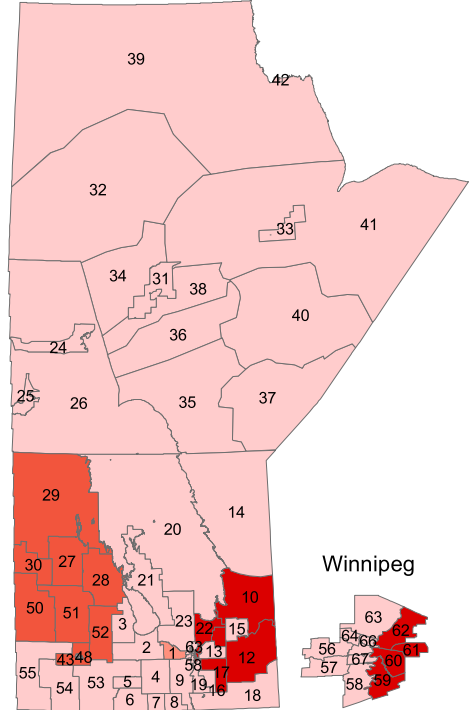

FSS

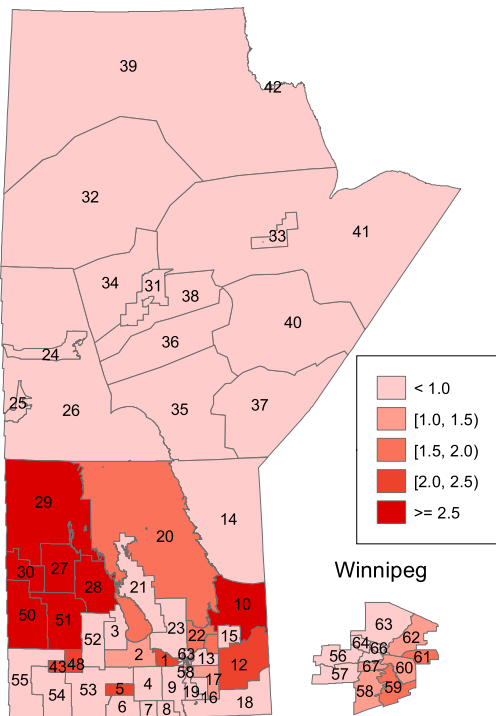

BYM

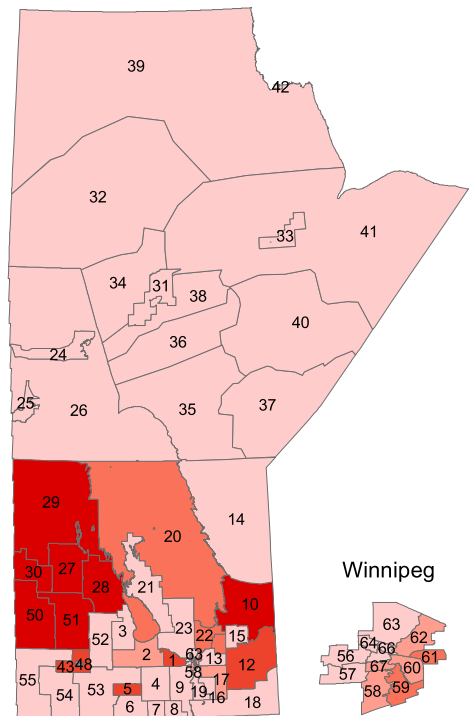

MLE

Supplement: MOESM3 [file 9498030]
